# Supplementary material for: Imatinib (STI571) Inhibits the Expression of Angiotensin-Converting Enzyme 2 and Cell Entry of the SARS-CoV-2-Derived Pseudotyped Viral Particles
Source: Int J Mol Sci. 2021 Jun 28;22(13):6938. doi: 10.3390/ijms22136938 (PMC8268654; doi:10.3390/ijms22136938)
Supplement: Supplementary file 1 [file ijms-22-06938-s001.zip › ijms-1235100-supplementary.pdf]

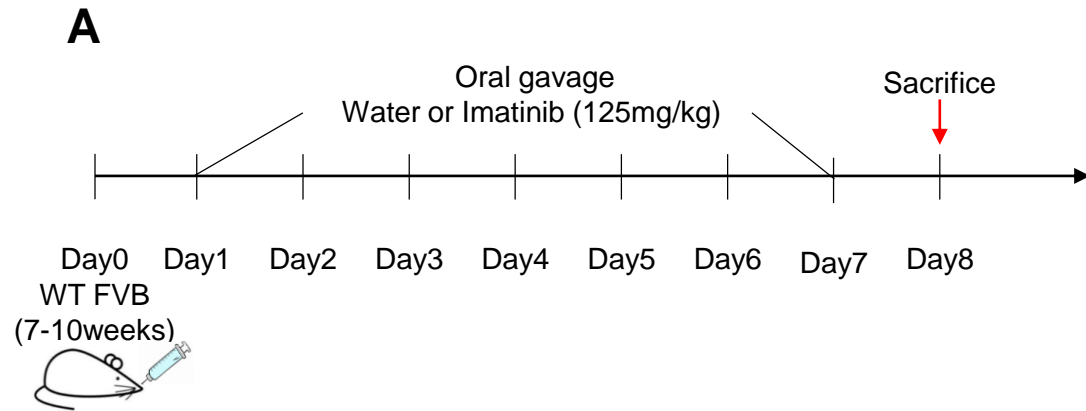

**Supplementary Figure S1. Imatinib treatment did not alter the expression of ACE2 in the brush border of the kidneys. A,** Schematic diagram of the treatment course. **B,** Kidney proximal convoluted tubules were stained for ACE2 as described in **Figure 5C**. The boxed areas are magnified to show the detail structures of the proximal convoluted tubules. ACE2 staining was assessed by Allred scoring and the data were plotted. Bars, standard deviation; Statistical significance was determined by Student's *t* test.

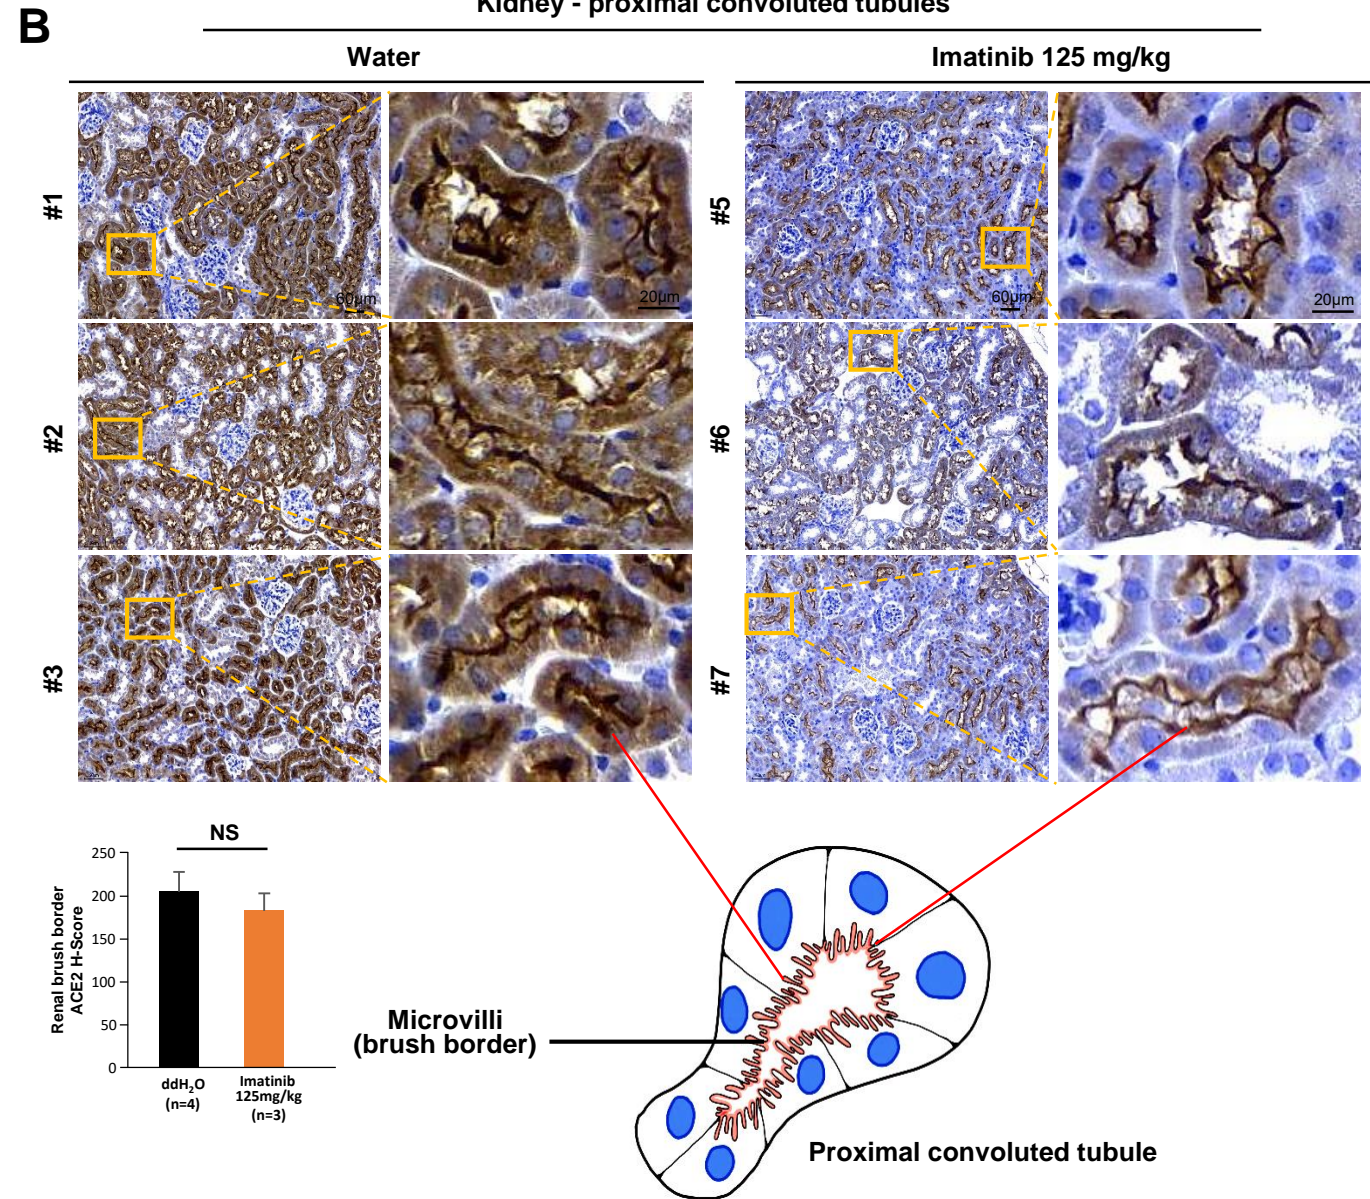

## Kidney

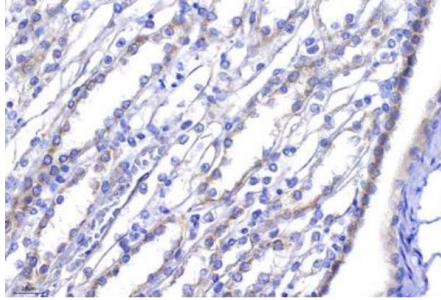

The cytoplasm of tubular epithelium in Henle's loop was graded 1+.

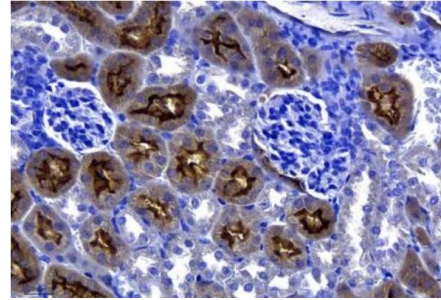

The tubular epithelium was graded 2+.

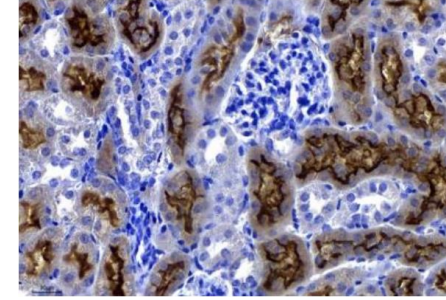

Different positive intensities in tubular cytoplasm and brush border: the brush border was graded 3+, while the cytoplasm was 2+.

## Lung

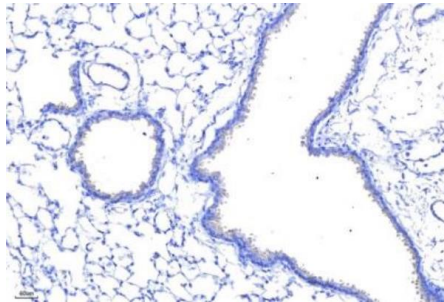

It depicted that the epithelium was graded 1+.

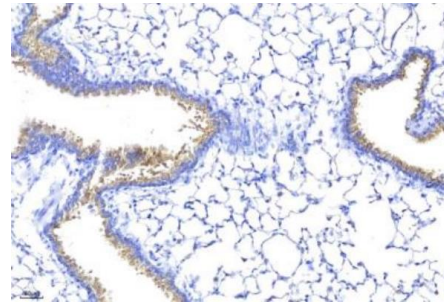

The epithelium was graded 2+.

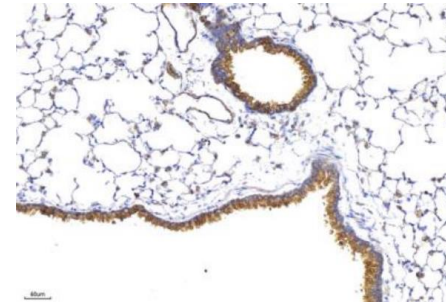

The bronchial epithelium was graded 3+.

**Supplementary Figure S2. Scoring criteria of IHC staining of ACE2 in the kidney and lung tissues.** Examples of locations and intensities score are depicted. Only the bronchial epithelium was evaluated. For the detailed procedure and scoring method, refer to the Materials and methods section.

|            |           | Exp1  |         | Exp2  |         | Exp3   |         |
|------------|-----------|-------|---------|-------|---------|--------|---------|
|            |           | luc   | renilla | luc   | renilla | luc    | renilla |
|            |           |       |         |       |         |        |         |
| ACE2 -1119 | DMSO      | 48797 | 6248    | 38781 | 5123    | 63141  | 7873    |
|            | Gefitinib | 67947 | 5873    | 69244 | 6342    | 90121  | 8653    |
|            | Erlotinib | 47185 | 4326    | 83017 | 6782    | 130928 | 10214   |
|            | Imatinib  | 42582 | 6532    | 37696 | 6112    | 62298  | 9333    |
|            | Lapatinib | 51114 | 5983    | 60153 | 8214    | 103229 | 12543   |
|            | Afatinib  | 23644 | 4287    | 45723 | 7512    | 70686  | 11098   |
| pGL2       | DMSO      | 1767  | 3212    | 3236  | 6471    | 4239   | 8653    |
|            | Gefitinib | 2044  | 3672    | 2540  | 5871    | 4920   | 9712    |
|            | Erlotinib | 1667  | 4902    | 2950  | 5325    | 3682   | 8321    |
|            | Imatinib  | 1994  | 3842    | 3207  | 6327    | 4737   | 9053    |
|            | Lapatinib | 4301  | 5021    | 4088  | 6421    | 6653   | 9832    |
|            | Afatinib  | 1188  | 4523    | 2161  | 4852    | 3454   | 7543    |

| Beas 2B    |          | Exp1 |         | Exp2 |         | Exp3 |         |
|------------|----------|------|---------|------|---------|------|---------|
|            |          | luc  | renilla | luc  | Renilla | luc  | renilla |
|            |          |      |         |      |         |      |         |
| ACE2 -1119 | DMSO     | 1502 | 2032    | 1245 | 2022    | 915  | 2025    |
|            | Imatinib | 1195 | 2378    | 1112 | 3150    | 1134 | 2827    |

| HEK293T         |  | Exp1        |          | Exp2        |          | Exp3        |          |
|-----------------|--|-------------|----------|-------------|----------|-------------|----------|
|                 |  | Ctrl (DMSO) | Imatinib | Ctrl (DMSO) | Imatinib | Ctrl (DMSO) | Imatinib |
|                 |  |             |          |             |          |             |          |
| ACE2 (Ct value) |  | 28.213      | 28.787   | 27.809      | 28.881   | 27.350      | 28.638   |
| 18s (Ct value)  |  | 10.476      | 10.607   | 10.460      | 10.332   | 10.564      | 11.791   |
| Vero E6         |  | Exp1        |          | Exp2        |          | Exp3        |          |
|                 |  | Ctrl (DMSO) | Imatinib | Ctrl (DMSO) | Imatinib | Ctrl (DMSO) | Imatinib |
|                 |  |             |          |             |          |             |          |
| ACE2 (Ct value) |  | 23.602      | 24.309   | 24.163      | 24.061   | 25.047      | 27.159   |
| 18s (Ct value)  |  | 12.905      | 12.631   | 13.498      | 11.887   | 14.020      | 15.654   |
| MDA-MB-231      |  | Exp1        |          | Exp2        |          | Exp3        |          |
|                 |  | Ctrl (DMSO) | Imatinib | Ctrl (DMSO) | Imatinib | Ctrl (DMSO) | Imatinib |
|                 |  |             |          |             |          |             |          |
| ACE2 (Ct value) |  | 33.379      | 34.790   | 32.790      | 33.653   | 33.087      | 34.179   |
| 18s (Ct value)  |  | 13.387      | 11.718   | 12.913      | 8.944    | 12.684      | 9.583    |
| Calu-3          |  | Exp1        |          | Exp2        |          | Exp3        |          |
|                 |  | Ctrl (DMSO) | Imatinib | Ctrl (DMSO) | Imatinib | Ctrl (DMSO) | Imatinib |
|                 |  |             |          |             |          |             |          |
| ACE2 (Ct value) |  | 30.847      | 28.791   | 28.172      | 30.385   | 28.971      | 25.483   |
| 18s (Ct value)  |  | 19.122      | 15.716   | 16.348      | 18.027   | 17.538      | 11.730   |

| Vpp assay       |  | Ctrl (DMSO) | Imatinib 1 uM | Imatinib 5 uM | Imatinib 10 uM |
|-----------------|--|-------------|---------------|---------------|----------------|
|                 |  |             |               |               |                |
|                 |  |             |               |               |                |
| Exp1            |  | 2220        | 2264          | 1725          | 994            |
| Exp2            |  | 2458        | 1008          | 1379          | 817            |
| Exp3            |  | 1813        | 2280          | 1523          | 479            |
| Viability assay |  | Ctrl (DMSO) | Imatinib 1 uM | Imatinib 5 uM | Imatinib 10 uM |
|                 |  |             |               |               |                |
|                 |  |             |               |               |                |
| Exp1            |  | 0.872       | 0.946         | 0.926         | 0.869          |
| Exp2            |  | 0.875       | 1.014         | 0.915         | 0.916          |
| Exp3            |  | 0.823       | 0.913         | 0.835         | 0.935          |

**Supplementary Figure S3. Original data of luciferase, qRT-PCR, and Vpp assays.** The data derived from Figure 1A (A), Figure 1C (B), Figure 2 (C), and Figure 4 (D) are shown. The data of three independent repeats (Exp 1, Exp 2, Exp 3) are shown.
